# Supplementary material for: Large-scale production of bioactive recombinant human acidic fibroblast growth factor in transgenic silkworm cocoons
Source: PubMed Central journal article supplement (PMC4644950; doi:10.1038/srep16323), 2015-11-16
Supplement: srep16323-s1.pdf [file srep16323-s1.pdf]

**Supplementary Information for**

**Large-scale production of bioactive recombinant human acidic fibroblast growth factor in transgenic silkworm cocoons by Feng Wang et al.**

Authors: Feng Wang<sup>1,2</sup>, Riyuan Wang<sup>1</sup>, Yuancheng Wang<sup>1,2</sup>, Ping Zhao<sup>1,2</sup>, Qingyou Xia<sup>1,2\*</sup>

Author affiliations:

<sup>1</sup>State Key Laboratory of Silkworm Genome Biology, Southwest University, Chongqing, China;

<sup>2</sup>College of biotechnology, Southwest University, Chongqing, China;

\*Corresponding author: Qingyou Xia

A11, nscaf 2766: 342874

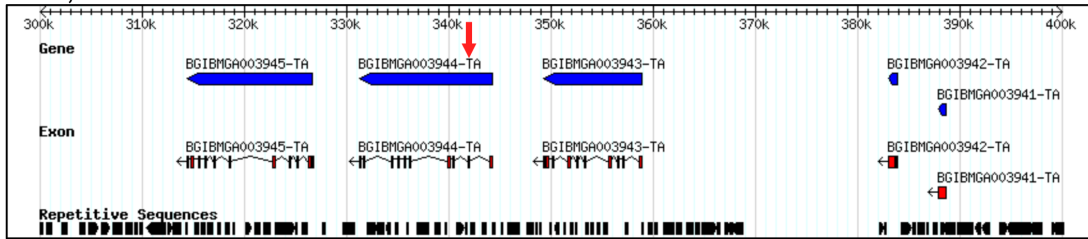

A1, nscaf2888: 4013240

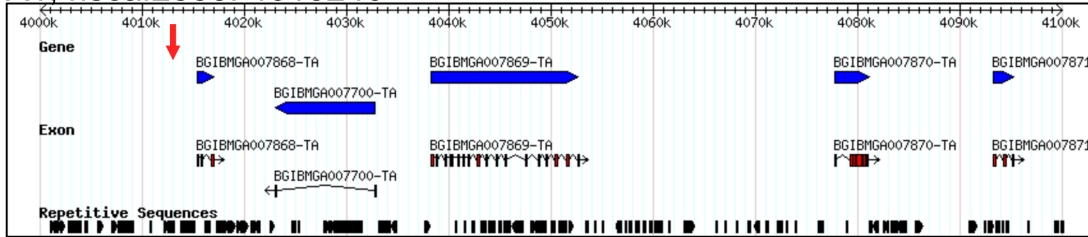

B10, nscaf1681: 5840922

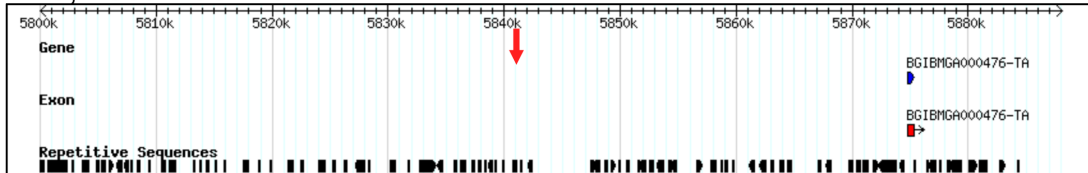

H2-1, nscaf1681: 5840922

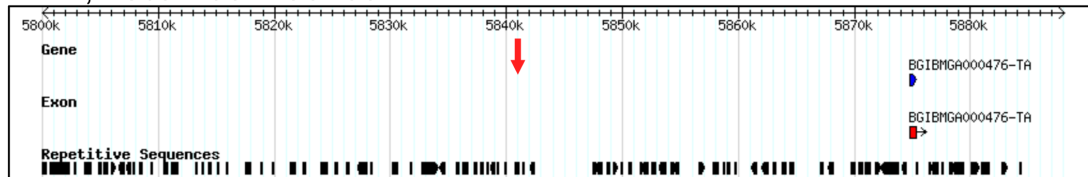

H2-2, nscaf2529: 169295

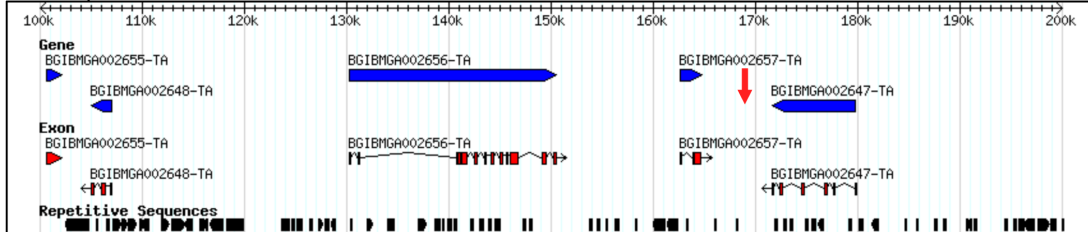

Supplementary Figure S1. Insertion loci information of the mutant strains after hybridization with the jumpstarter. The red arrow represents the insertion loci of each selected mutant strains, and the endogenous genes nearby and their expression orientations were indicated.

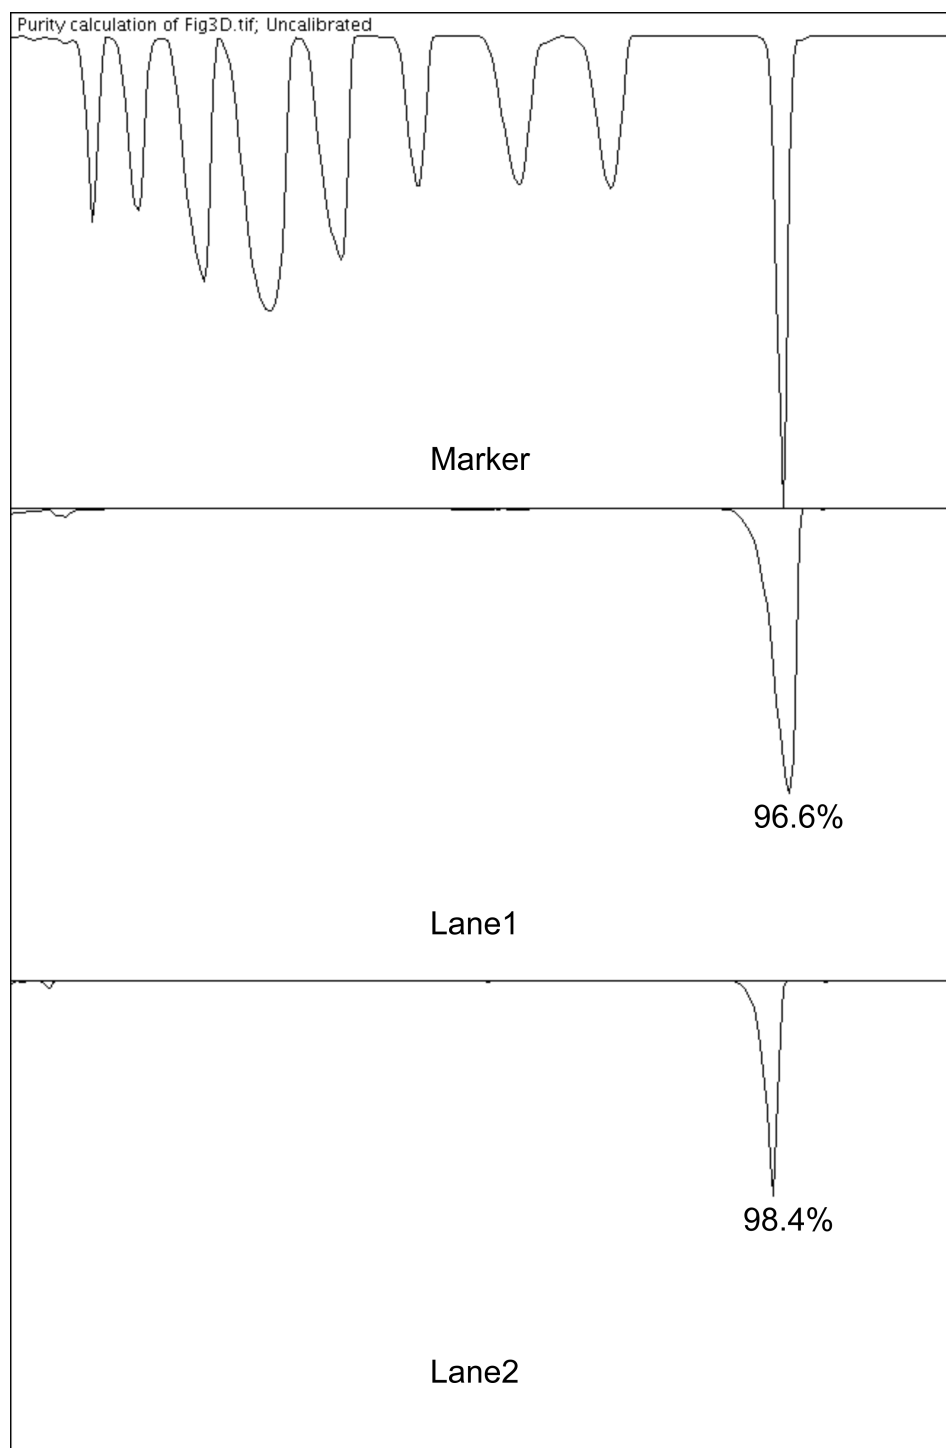

Supplementary Figure S2. Purity calculation of haFGF by image J software.

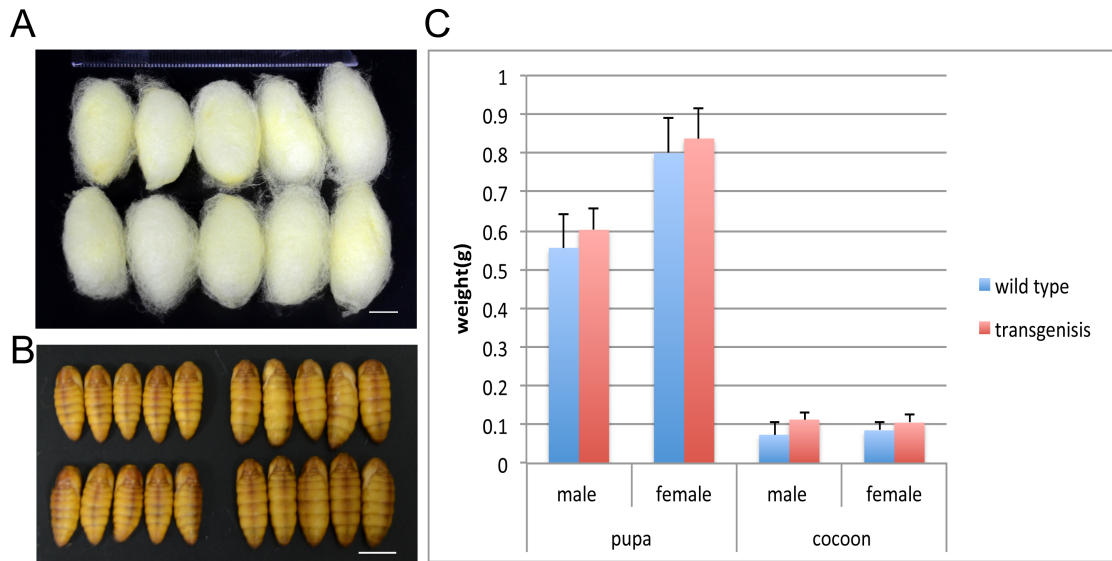

Supplementary Figure S3. Economic characteristics of the transgenic silkworm. A. The morphology comparisons of cocoons between transgenic silkworms (upper) and non-transgenic silkworms (below). B. The morphology comparisons of pupae between transgenic silkworms (upper) and non-transgenic silkworms (below). C. Weight statistics of the male and female cocoon and pupa between transgenic silkworm and the wild type silkworm. Statistical data for each group were calculated from 100 individuals.

Supplementary Table S1 integration sites of remobilized transgenes in silkworm genome.

| Strain | Chr. | Location          | Flanking sequence                                      |
|--------|------|-------------------|--------------------------------------------------------|
| A11    | 17   | nscf2766: 342874  | TCAGCTTAGCACTATTATTAA-Transgene-TTAAGGTATGAACTAATAACTT |
| A1     | 15   | nscf2888: 4013240 | GTAGTAGGGAAACTGATTTAA-Transgene-TTAAGGACAAATAAAATGTTA  |
| B10    | 22   | nscf1681: 5840922 | TGCCAGATTGTTTCCCTTTAA-Transgene-TTAAAAGATCTAAAAAAAAGTC |
| H2     | 22   | nscf1681: 5840922 | TGCCAGATTGTTTCCCTTTAA-Transgene-TTAAAAGATCTAAAAAAAAGTC |
|        | 5    | nscf2529: 169295  | CGATCCGAGGCACAATATTAA-Transgene-TTAATGTACTTCAGGTGTACTC |
